# Supplementary material for: Molecular recognition of aromatic carboxylic acids by hydroxypropyl-γ-cyclodextrin: experimental and theoretical evidence
Source: Royal Society of Chemistry journal article supplement (doi:10.1039/c6ra06340c), 2016-01-01
Supplement: c6ra06340c1.pdf [file c6ra06340c1.pdf]

Primary calorimetric data for complex formation of hydroxypropyl- $\gamma$ -cyclodextrin with aromatic carboxylic acids in water at 298.15 K

| $m_{\text{acid}}$ , mol/kg | $\Delta_{\text{tr}}H$ , kJ/mol |
|----------------------------|--------------------------------|
| BA + HP- $\gamma$ -CD      |                                |
| 0.0027                     | -1.40                          |
| 0.0061                     | -4.87                          |
| 0.0078                     | -6.98                          |
| 0.0103                     | -9.64                          |
| 0.0132                     | -12.04                         |
| 0.0163                     | -14.42                         |
| 0.0198                     | -16.27                         |
| 0.0247                     | -17.36                         |
| 0.0299                     | -19.06                         |
| pABA + HP- $\gamma$ -CD    |                                |
| 0.0030                     | -2.35                          |
| 0.0045                     | -5.09                          |
| 0.0070                     | -8.13                          |
| 0.0104                     | -10.47                         |
| 0.0138                     | -14.14                         |
| 0.0174                     | -17.21                         |
| 0.0206                     | -18.44                         |
| 0.0252                     | -21.69                         |
| 0.0300                     | -25.85                         |
| 0.0355                     | -27.41                         |
| 0.0391                     | -29.86                         |
| mABA + HP- $\gamma$ -CD    |                                |
| 0.0052                     | -0.80                          |
| 0.0098                     | -1.01                          |
| 0.0150                     | -0.54                          |
| 0.0206                     | -0.65                          |
| 0.0261                     | -0.95                          |
| 0.0319                     | -1.05                          |
| 0.0383                     | -1.95                          |
| NA + HP- $\gamma$ -CD      |                                |
| 0.0194                     | -0.10                          |
| 0.0504                     | -0.24                          |
| 0.0808                     | -0.56                          |
| 0.106                      | -1.45                          |
| 0.149                      | -1.92                          |
